# Supplementary material for: Mapping snow avalanches hazard in poorly monitored areas. The case of Rigopiano avalanche, Apennines of Italy
Source: Copernicus journal article supplement (doi:10.5194/nhess-2018-358), 2018-12-06
Supplement: Supplementary file [file nhess-2018-358-AC2-supplement.pdf]

Rev. 2

The authors do not understand why the Reviewer here remains anonymous. The meaning of open discussion as pursued in NHESS is to openly present fair comments that are publicly spread, and that both authors and reviewers reveal their identity.

Hiding behind anonymous is unfair, especially when presenting arbitrary arguments as here.

Here specifically there is not one scientific argument that the authors can comment, but only personal opinions, mostly unexplained.

The paper deals with snow avalanche hazard mapping carried in situations when no historical avalanche data are present, like central Italy. In these cases, model tuning and data based assessment of avalanche return periods are hardly feasible.

The idea is to We demonstrate that properly tuned 1D/quasi2D models can be used for avalanche modelling and that the use of regional scale analysis allows mapping for large return periods, reducing greatly the uncertainty against easier single site analysis.

Indeed, the topic is exactly this, the difficulties of mapping avalanche hazard in poorly measured areas. We try to demonstrate the use of regionally based methods (specifically for H72 assessment) may reduce the large uncertainty entailed here.

The topic is interesting, however the scientific soundness of the paper is poor. Moreover, the case history called into play (namely, the Rigopiano Avalanche occurred in central Italy on January 2017) shows that local analyses are always preferable when dealing with specific hazard (e.g. building or infrastructures prone to avalanche impact).

Scientific soundness is poor why ? This is an opinion. How can the authors respond ?

“shows that local analyses are always preferable when dealing with specific hazard”

Shows how ? Apparently the reviewer did not catch properly the content of the manuscript. Either the reviewer elaborate, or this is simply an opinion.

Therefore, I suggest to reject the paper.

Not clear on what ground the manuscript should be rejected. The authors cannot even provide a response here.
